# Supplementary material
Source: Research Square preprint supplement (doi:10.21203/rs.3.rs-9382313/v1)
Supplement: Supplementary file 1 [file 087ba973b364041b629a1848.doc]

**Supplementary Table S1: List of Upland cotton (*Gossypium hirsutum***) genotypes used in the study

| **Sr. No.** | **Name of genotypes** | **Source** | **Origin** |
| --- | --- | --- | --- |
| 1 | USA 47 A | CICR, Nagpur | USA |
| 2 | S 2 | CICR, Nagpur | Coimbatore |
| 3 | H 1639 | CCS HAU, Hisar | Hisar |
| 4 | USA 50 | CICR, Nagpur | USA |
| 5 | V 78-156 | CICR, Nagpur | USA |
| 6 | SHAHD 50 | CICR, Nagpur | Iran |
| 7 | West Burn 70 | CICR, Nagpur | USA |
| 8 | 1619 CE | CICR, Nagpur | Coimbatore |
| 9 | 9030 D | CICR, Nagpur | Coimbatore |
| 10 | H 1640 | CCS HAU, Hisar | Hisar |
| 11 | Mc Nair 1032 | CICR, Nagpur | USA |
| 12 | H 1641 | CCS HAU, Hisar | Hisar |
| 13 | 152F | CICR, Nagpur | USSR |
| 14 | Tamcot CAMDE | CICR, Nagpur | Coimbatore |
| 15 | 1-10 B | CICR, Nagpur | USA |
| 16 | H 1300 | CCS HAU, Hisar | Hisar |
| 17 | USA 57/7 | CICR, Nagpur | USA |
| 18 | H 1642 | CCS HAU, Hisar | Hisar |
| 19 | PKV 081 | CICR, Nagpur | Akola |
| 20 | 133 F-K-P1 | CICR, Nagpur | USSR |
| 21 | H 1643 | CCS HAU, Hisar | Hisar |
| 22 | NHBBR 9 | CICR, Nagpur | Coimbatore |
| 23 | NHBBR 17 | CICR, Nagpur | Coimbatore |
| 24 | NHBBR 14 | CICR, Nagpur | Coimbatore |
| 25 | ELS 398 | CICR, Nagpur | Surat |
| 26 | LRA 5166 | CICR, Nagpur | USA |
| 27 | Supriya | CICR, Nagpur | Coimbatore |
| 28 | N 9 | CICR, Nagpur | USA |
| 29 | Sukrana | CICR, Nagpur | Coimbatore |
| 30 | Surab 72 | CICR, Nagpur | Coimbatore |
| 31 | Surpan | CICR, Nagpur | Coimbatore |
| 32 | T 130-10- del | CICR, Nagpur | USA |
| 33 | T 219-6-SV 6 A | CICR, Nagpur | USA |
| 34 | H 1644 | CCS HAU, Hisar | Hisar |
| 35 | TH 12-7 | CICR, Nagpur | Indore |
| 36 | TH 16 | CICR, Nagpur | Indore |
| 37 | NHBBR 19 | CICR, Nagpur | Coimbatore |
| 38 | NHBBR 21 | CICR, Nagpur | Coimbatore |
| 39 | H 1645 | CCS HAU, Hisar | Hisar |
| 40 | 7203-14-104 | CICR, Nagpur | Unknown |
| 41 | H 1646 | CCS HAU, Hisar | Hisar |
| 42 | H 1647 | CCS HAU, Hisar | Hisar |
| 43 | H 1648 | CCS HAU, Hisar | Hisar |
| 44 | E 792 | CICR, Nagpur | Unknown |
| 45 | H 1649 | CCS HAU, Hisar | Hisar |
| 46 | NHBBR 9-1 | CICR, Nagpur | Coimbatore |
| 47 | H 1650 | CCS HAU, Hisar | Hisar |
| 48 | CB 2482 | CICR, Nagpur | USA |
| 49 | H 777 | CICR, Nagpur | Punjab |
| 50 | H 1651 | CCS HAU, Hisar | Hisar |
| 51 | H 1652 | CCS HAU, Hisar | Hisar |
| 52 | HS 45 | CCS HAU, Hisar | Hisar |
| 53 | 1301 DDP3 | CICR, Nagpur | Coimbatore |
| 54 | 1-10 B P2 | CICR, Nagpur | USA |
| 55 | Tamcot CAMDE-1 | CICR, Nagpur | Coimbatore |
| 56 | Tamcot CAMDE-2 | CICR, Nagpur | Coimbatore |
| 57 | H 1653 | CCS HAU, Hisar | Hisar |
| 58 | H 1654 | CCS HAU, Hisar | Hisar |
| 59 | H 1655 | CCS HAU, Hisar | Hisar |
| 60 | E ML 14 -1 | CICR, Nagpur | USA |
| 61 | Deltapine 14 | CICR, Nagpur | USA |
| 62 | H 1656 | CCS HAU, Hisar | Hisar |
| 63 | H 1657 | CCS HAU, Hisar | Hisar |
| 64 | Texas special | CICR, Nagpur | USA |
| 65 | H 1353 | CCS HAU, Hisar | Hisar |
| 66 | ALEPPO (Rex) | CICR, Nagpur | Syria |
| 67 | Cirlon 2862 | CICR, Nagpur | Coimbatore |
| 68 | DL1 | CICR, Nagpur | Coimbatore |
| 69 | SA 320 F | CICR, Nagpur | Coimbatore |
| 70 | DL 8 | CICR, Nagpur | Coimbatore |
| 71 | Paymaster | CICR, Nagpur | USA |
| 72 | Acala 15-17 | CICR, Nagpur | USA |
| 73 | N 26 | CICR, Nagpur | USA |
| 74 | Delfos 4 | CICR, Nagpur | USA |
| 75 | Texas 244 | CICR, Nagpur | USA |
| 76 | Texas 377 | CICR, Nagpur | USA |
| 77 | Texas 937 | CICR, Nagpur | USA |
| 78 | N 27 | CICR, Nagpur | Unknown |
| 79 | PD 695-1 | CICR, Nagpur | Unknown |
| 80 | DL 3A | CICR, Nagpur | Coimbatore |
| 81 | L 147 | CICR, Nagpur | Akola |
| 82 | H 1658 | CCS HAU, Hisar | Hisar |
| 83 | PIL 8 | CICR, Nagpur | USA |
| 84 | PIL 43 | CICR, Nagpur | USA |
| 85 | H 1659 | CCS HAU, Hisar | Hisar |
| 86 | Deltapine 66 (STP 27) | CICR, Nagpur | USA |
| 87 | H 1660 | CCS HAU, Hisar | Hisar |
| 88 | RS 921 | CICR, Nagpur | Sriganganagar |
| 89 | H1226 | CCS HAU, Hisar | Hisar |
| 90 | Khandwa 2 | CICR, Nagpur | Coimbatore |
| 91 | HT /91/P 14 | CCS HAU, Hisar | Hisar |
| 92 | P16 | CICR, Nagpur | Nigeria |
| 93 | P22 | CICR, Nagpur | Nigeria |
| 94 | P24 | CICR, Nagpur | Nigeria |
| 95 | P25 | CICR, Nagpur | Nigeria |
| 96 | P32 | CICR, Nagpur | Nigeria |
| 97 | P42 | CICR, Nagpur | Nigeria |
| 98 | P44 | CICR, Nagpur | Nigeria |
| 99 | P50 | CICR, Nagpur | Nigeria |
| 100 | P51 | CICR, Nagpur | Nigeria |
| 101 | P57 | CICR, Nagpur | Nigeria |
| 102 | P59 | CICR, Nagpur | Nigeria |
| 103 | P41 | CICR, Nagpur | Nigeria |
| 104 | H 1661 | CCS HAU, Hisar | Hisar |
| 105 | G Cot H 8 P2 | CICR, Nagpur | Gujarat |
| 106 | G Cot H 8 P3 | CICR, Nagpur | Gujarat |
| 107 | H 1662 | CCS HAU, Hisar | Hisar |
| 108 | H 1663 | CCS HAU, Hisar | Hisar |
| 109 | H 1664 | CCS HAU, Hisar | Hisar |
| 110 | H 778 | CICR, Nagpur | Punjab |
| 111 | NZH 321/99 | CICR, Nagpur | Coimbatore |
| 112 | B 56-181A | CICR, Nagpur | Indore |
| 113 | B 57 -562 | CICR, Nagpur | Indore |
| 114 | H 1665 | CCS HAU, Hisar | India |
| 115 | NH 545 | CICR, Nagpur | Coimbatore |
| 116 | Sahana | CICR, Nagpur | Coimbatore |
| 117 | B 61-1865 | CICR, Nagpur | Indore |
| 118 | Atlas 59-182 | CICR, Nagpur | USA |
| 119 | Auburn56-2 | CICR, Nagpur | USA |
| 120 | Auburn-M | CICR, Nagpur | USA |
| 121 | Trimph | CICR, Nagpur | USA |
| 122 | B 57-960 A | CICR, Nagpur | Indore |
| 123 | B 61-2037 C | CICR, Nagpur | Indore |
| 124 | B 61-2128 | CICR, Nagpur | Indore |
| 125 | B 59-1679 | CICR, Nagpur | Indore |
| 126 | Ganganagar Ageti (susceptible check) | ARS, Sriganganagar | Sriganganagar |
| 127 | RS 2013 (tolerant check) | ARS, Sriganganagar | Sriganganagar |

**Supplementary Table S2: Multiple linear regression analysis of leafhopper population, jassid injury grade, morpho-physiological and biochemical traits among cotton genotypes**

| **Sr. No.** | **Regression equation** | **R2** | **100R2** | **Role of individual trait (%)** | **S.E.** | **F Value** |
| --- | --- | --- | --- | --- | --- | --- |
| 1 | Y=5.0082-0.00382PH | 0.002 | 0.21 | 0.21 | 0.96 | 0.26 |
| 2 | **Y= 5.912 -0.0038PH -0.0071LTD** | 0.455 | 45.54 | 45.33 | 0.71 | 51.85 |
| 3 | **Y=6.021-0.0033PH-0.0068LTD**-0.0068TL | 0.462 | 46.16 | 0.62 | 0.71 | 35.16 |
| 4 | **Y= 4.516 -0.0036PH -0.0066LTD** -0.0069TL +0.0212LWC | 0.475 | 47.53 | 1.37 | 0.70 | 27.64 |
| 5 | **Y= 5.5081-0.0021PH -0.0066LTD** -0.0069TL +0.01805LWC -0.0259CC | 0.481 | 48.08 | 0.55 | 0.70 | 22.42 |
| 6 | **Y=5.2248 -0.00073PH -0.0065LTD** -0.0067TL +0.0188LWC -0.02013CC -0.0224PR | 0.483 | 48.35 | 0.27 | 0.70 | 18.72 |
| 7 | **Y=3.2079 +0.00162PH -0.00632LTD** -0.0069TL +0.0155LWC +0.00025CC -0.0083PR +0.3448TR** | 0.522 | 52.24 | 3.89 | 0.68 | 18.59 |
| 8 | **Y=1.9650 +0.0034PH -0.0052LTD** -0.0088TL +0.0244LWC** -0.0191CC -0.01491PR +0.3066TR** +9.1182SC** | 0.576 | 57.64 | 5.4 | 0.64 | 20.07 |
| 9 | **Y=1.512 +0.0033PH -0.0044LTD** -0.0086TL +0.0253LWC** -0.0182CC -0.0145PR +0.3094TR** +8.9813SC** +0.0099TS | 0.578 | 57.84 | 0.20 | 0.64 | 17.83 |
| 10 | **Y=3.752 +0.0014PH -0.0036LTD** -0.0043TL +0.0212LWC* -0.0086CC -0.0043PR +0.2522TR** +8.0862SC** +0.0021TS -0.1631TPH** | 0.656 | 65.57 | 7.70 | 0.58 | 22.09 |
| 11 | **Y=3.454 +0.0021PH -0.0033LTD** -0.0029TL­ +0.0179LWC -0.00082CC -0.01549PR +0.2141TR* +8.271SC** +0.00425TS -0.0289TPH -0.2307T** | 0.682 | 68.24 | 2.67 | 0.56 | 22.46 |
| 12 | **Y=3.0764 +0.0028PH -0.0025LTD* -0.0026TL +0.0222LWC** +0.0055CC -0.03282PR +0.2336TR* +8.8845SC** -0.0154TS +0.0859TPH -0.1502T* -0.4442G** | 0.716 | 71.62 | 3.38 | 0.54 | 23.97 |
| 13 | **Y=0.9283 +0.0017PH -0.00052LTD* -0.00064TL +0.0208LWC* +0.00412CC -0.0265PR +0.2349TR** +8.3147SC** -0.0136TS +0.1086TPH** -0.1617T* -0.3658G** +0.8038JIG** | 0.753 | 75.29 | 3.67 | 0.50 | 26.49 |
| 14 | **Y=1.3959 +0.0019PH -0.00049LTD* -0.00077TL +0.02175LWC* +0.0040CC -0.0248PR +0.2265TR** +8.3502SC** -0.01488TS +0.1114TPH* -0.1607T* -0.3794G** +0.8046JIG** -0.0135GOT | 0.754 | 75.39 | 0.10 | 0.50 | 24.51 |
| 15 | **Y=1.535 +0.00117PH -0.000048LTD* -0.00082TL +0.0222LWC* +0.00918CC -0.0171PR +0.1917TR* +8.2032SC** -0.01462TS +0.09041TPH -0.1606T** -0.3616G** +0.7981JIG** -0.0065GOT -0.00548SCY | 0.759 | 75.88 | 0.49 | 0.50 | 23.28 |

** Significant at 1%, * Significant at 5 %

Y- Leafhopper population per 3 leaves per plant, R2: coefficient of determination,

PH - Plant height, LTD- Leaf trichome density, TL -Trichome length, LWC - Leaf water content, CC - Chlorophyll content, PR- Photosynthetic rate, TR- Transpiration rate, SC- Stomatal conductance, TS -Total sugar, TPh -Total phenol, TC – Tannin content, GC – Gossypol content, JIG- Jassid injury grade, GOT -Ginning outturn and SCY - Seed Cotton yield per plant

**Supplementary Fig. S1: Pooled weather chart of *Kharif* 2021 and 2022**

***
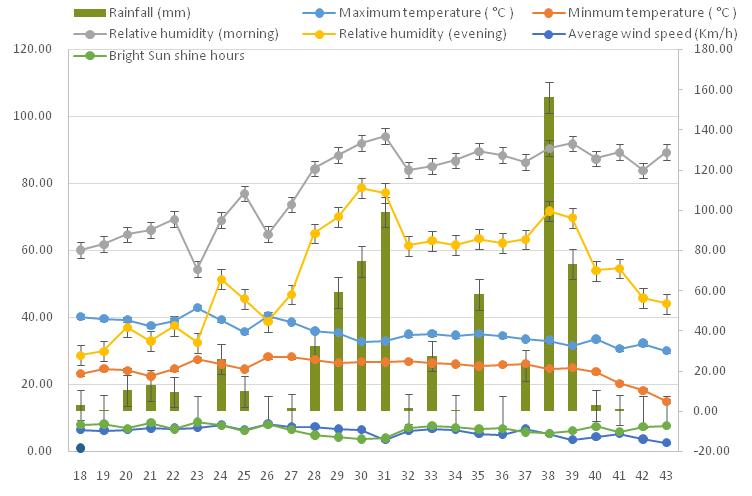
***

**Standard metrological week**

**Supplementary Fig. S2: Leaf trichome density on abaxial leaf surface and rating scale in cotton genotypes**
